# Supplementary material for: Dietary Supplementation with a Blend of Hydrolyzable and Condensed Tannins Ameliorates Diet-Induced Intestinal Inflammation in Zebrafish (Danio rerio)
Source: MDPI journal article supplement (doi:10.3390/ani13010167), 2022-12-31
Supplement: s1 [file s1]

**Table S1.** Primer sequences for qRT-PCR.

| Gene              | Sequence 5'-3'                                            | Reference                                                                                           |
|-------------------|-----------------------------------------------------------|-----------------------------------------------------------------------------------------------------|
| <i>beta actin</i> | F: GCAGAAGGAGATCACATCCCTGGC<br>R: CATTGCCGTCACCTTCACCGTTC | <a href="https://doi.org/10.3390/nu13030998">https://doi.org/10.3390/nu13030998</a>                 |
| <i>cox2</i>       | F: CCCTGTCAGAATCGAGGTGT<br>R: TTGGGAGAAGGCTTCAGAGA        | <a href="https://doi.org/10.1038/nchembio.147">https://doi.org/10.1038/nchembio.147</a>             |
| <i>il1b</i>       | F: GGA CTTCGCAGCACAAAATGAA<br>R: TTC ACTTCACGCTCTTG GATGA | <a href="https://doi.org/10.1101/2020.04.09.033837">https://doi.org/10.1101/2020.04.09.033837</a>   |
| <i>cxcl8-l1</i>   | F: GTCGCTGCATTGAAACAGAA<br>R: CTTAACCCATGGAGCAGAGG        | <a href="https://doi.org/10.4049/jimmunol.1203266">https://doi.org/10.4049/jimmunol.1203266</a>     |
| <i>tnfa</i>       | F: GGGCAATCAACAAGATGGAAG<br>R: GCAGCTGATGTGCAAAGACAC      | <a href="https://doi.org/10.1038/s41598-018-28511-w">https://doi.org/10.1038/s41598-018-28511-w</a> |

**Table S2.** BW increment (mg), VFI (mg), and FCR observed during the experimental period for the considered treatments.

| Parameters | BW increment |     | VFI    |     | FCR    |     |
|------------|--------------|-----|--------|-----|--------|-----|
| Treatments | m            | ds  | m      | ds  | m      | ds  |
| Control    | 59,1         | 3,3 | 13,2   | 0,9 | 2,7    | 0,3 |
| TSP 12     | 58,2         | 3,3 | 14,5   | 0,9 | 2,8    | 0,3 |
| TSP 24     | 65,1         | 3,0 | 13,1   | 0,8 | 2,4    | 0,1 |
| TSP 48     | 64,3         | 2,8 | 14,5   | 0,9 | 2,7    | 0,2 |
| SEM        | 0.894        |     | 0,261  |     | 0,063  |     |
| P          | 0,0578       |     | 0,1687 |     | 0,0733 |     |

\*SEM: Standard error of the mean.

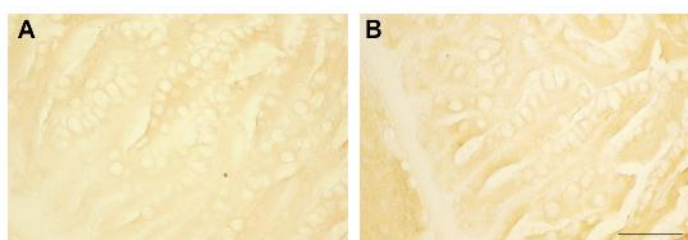**Figure S1.** Antibodies specificity. Negative controls performed by omitting the primary antibodies for TNF $\alpha$  (A) or COX2 (B). Scale bar: 100  $\mu$ m.

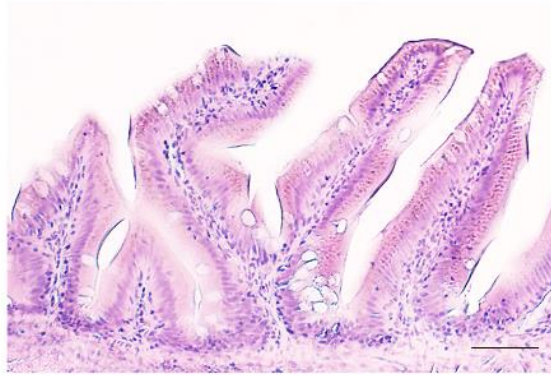

|                                           |           |
|-------------------------------------------|-----------|
| Total morphological alterations score (n) | $4 \pm 1$ |
| Mean number of Goblet cells/villus (n)    | $7 \pm 2$ |

**Figure S2.** Hematoxylin and eosin (H&E) staining of intestine of zebrafish fed a diet based on *Artemia salina* cysts. Scale bar: 100  $\mu\text{m}$ . In the table, the score number of the morphological alteration and the number of goblet cells/villus in the same zebrafish are reported.
